# Supplementary material for: Chloramine Disinfection of Levofloxacin and Sulfaphenazole: Unraveling Novel Disinfection Byproducts and Elucidating Formation Mechanisms for an Enhanced Understanding of Water Treatment
Source: MDPI journal article supplement (doi:10.3390/molecules29020396), 2024-01-13
Supplement: s1 [file s1]

## **Supporting Information**

# **Chloramine Disinfection of Levofloxacin and Sulfaphenazole: Unraveling Novel Disinfection Byproducts and Elucidating Formation Mechanisms for an Enhanced Understanding of Water Treatment**

**Zhenkun Sun, Zhenyi Chen, Marie Celine Chung Lan Mow, Xiaowen Liao, Xiaoxuan Wei \*, Guangcai Ma, Xueyu Wang and Haiying Yu \***

College of Geography and Environmental Sciences, Zhejiang Normal University, Yingbin Avenue 688, Jinhua 321004, China

\* Correspondence: xxwei@zjnu.edu.cn (X.W.); yhy@zjnu.cn (H.Y.);  
Tel.: +86-0579-82282485 (H.Y.)

**Figure**

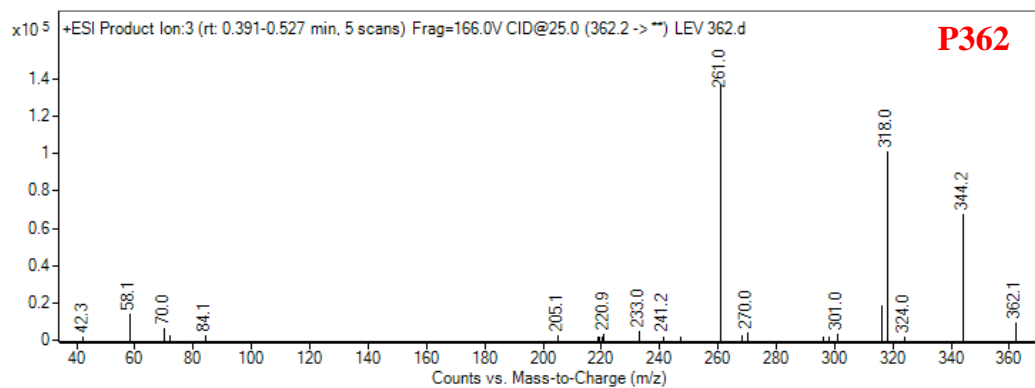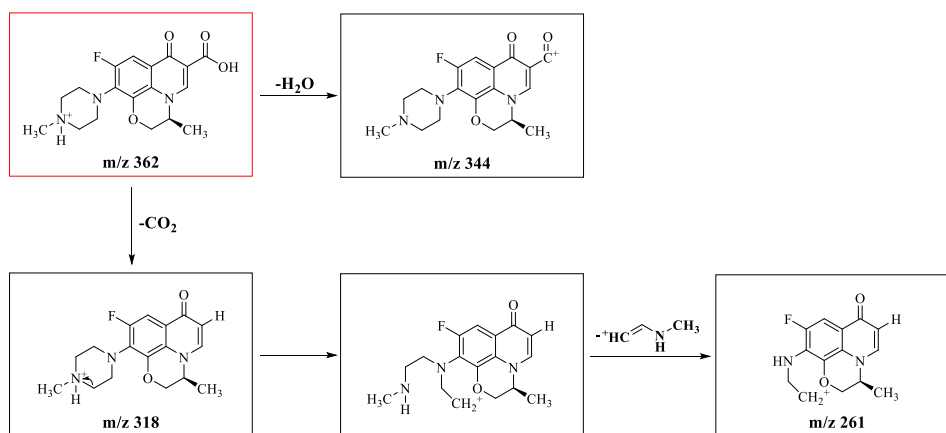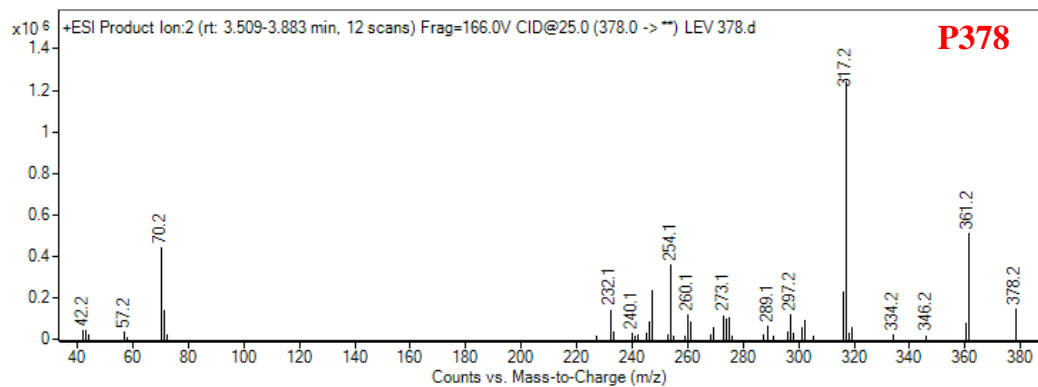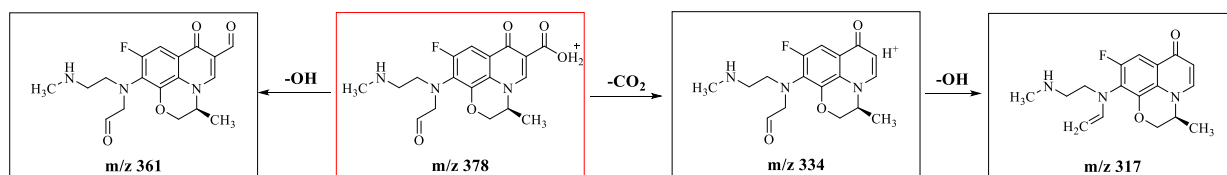

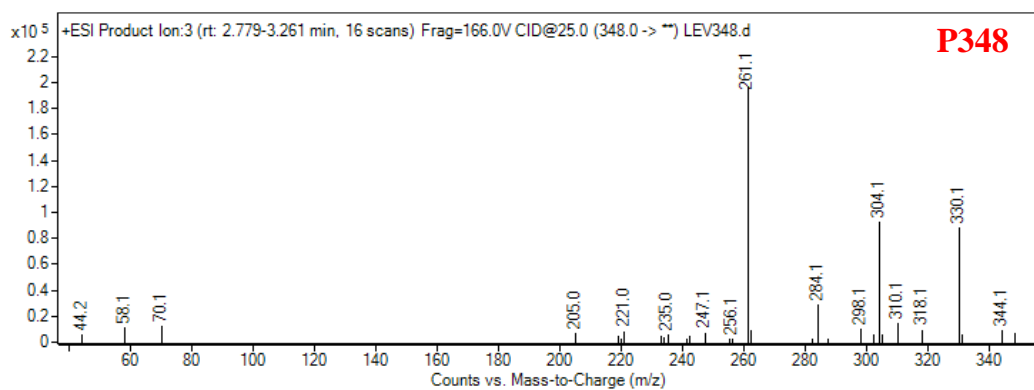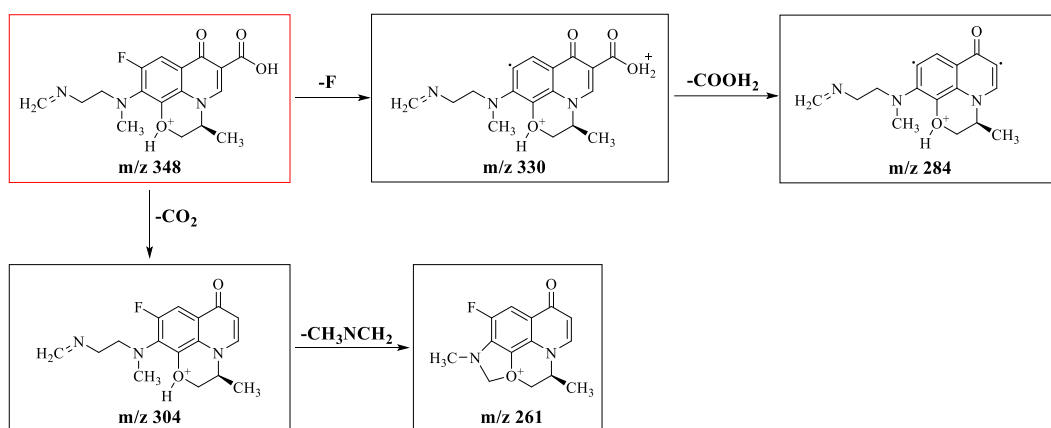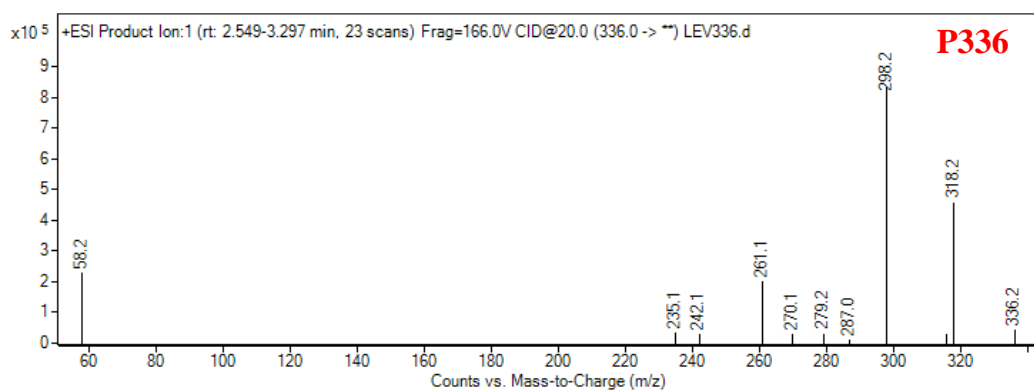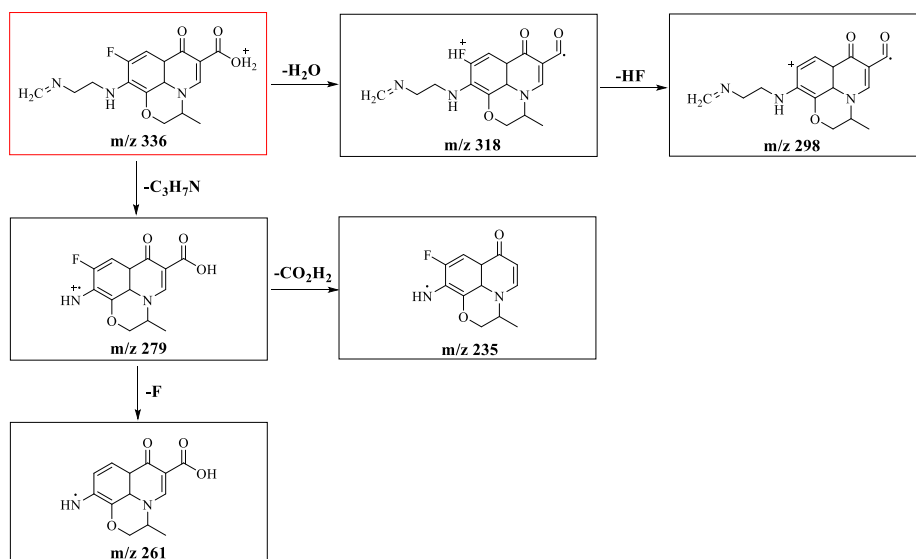

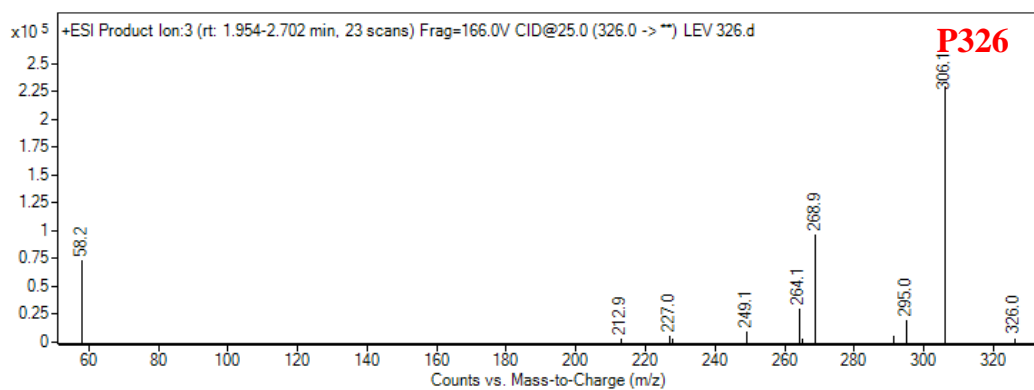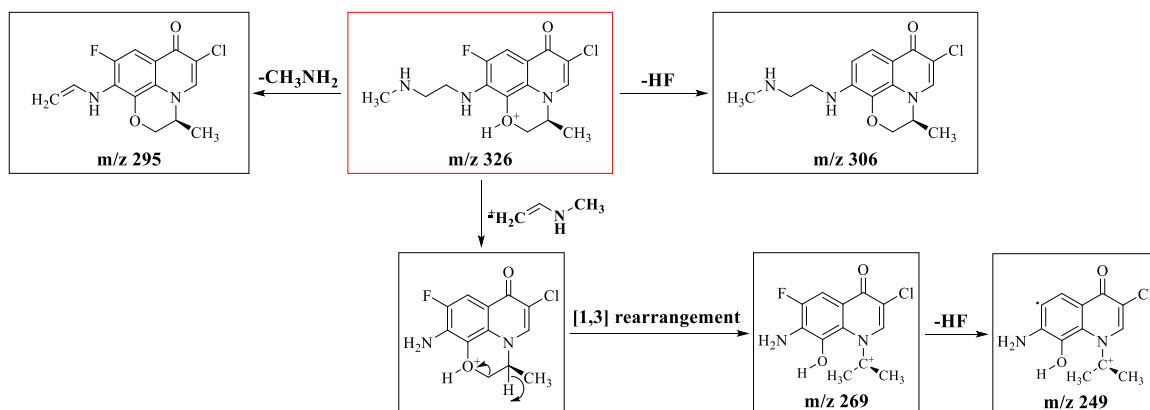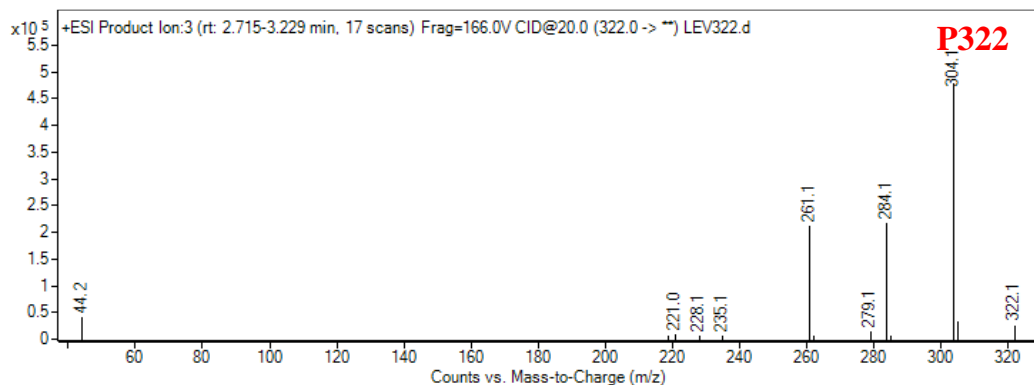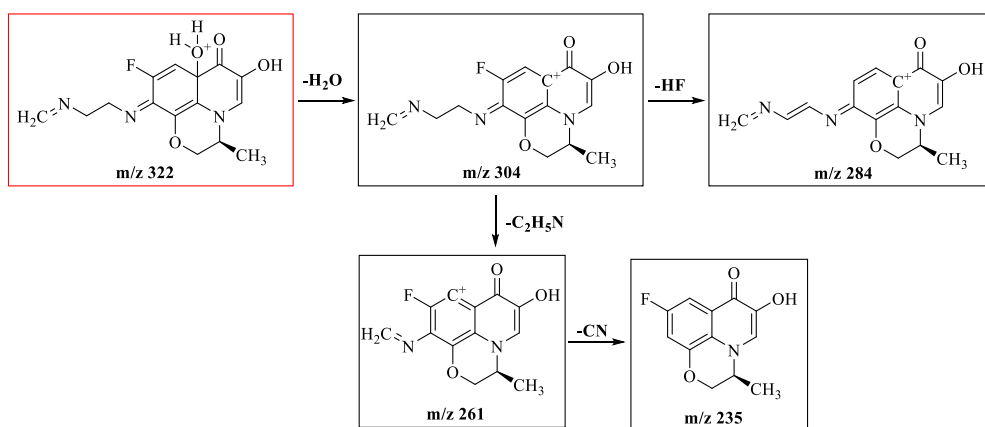

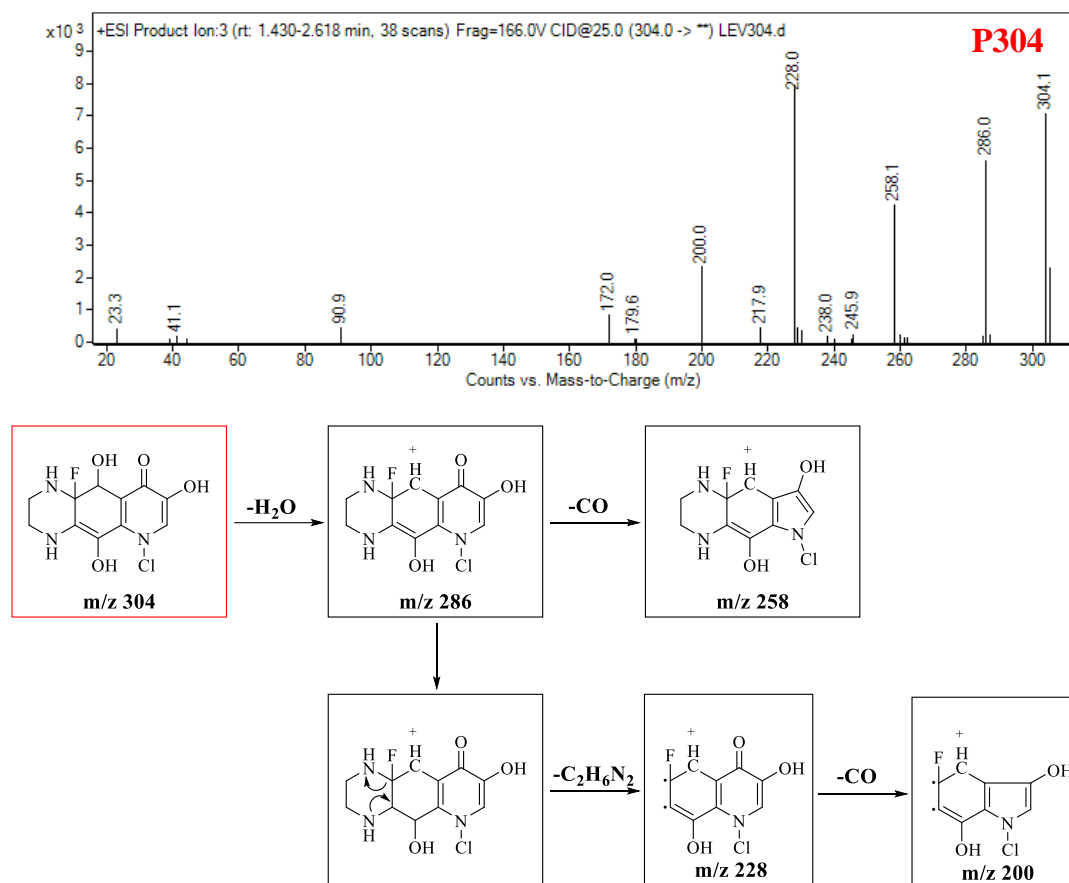

Figure S1. Secondary mass spectrometry of the by-products of chloramine disinfection of LEV.
